# Supplementary material
Source: PubMed Central journal article supplement (PMC4288881)
Supplement: IAI.02042-14_zii999091029so1.pdf [file IAI.02042-14_zii999091029so1.pdf]

## Supplemental material

**Table S1** Bacterial strains used in the study

| Strain                       | Description                                                                   | Reference  |
|------------------------------|-------------------------------------------------------------------------------|------------|
| <i>E. coli</i>               |                                                                               |            |
| S17-1                        | <i>hsdR17 recA1 RP4-2-tet::Mu-1kan::Tn7 Sm<sup>R</sup></i>                    | (1)        |
| <i>P. aeruginosa</i>         |                                                                               |            |
| PAO1                         | Wild-type <i>P. aeruginosa</i>                                                | (2)        |
| <i>C. canimorsus</i>         |                                                                               |            |
| <i>C. canimorsus</i> 5 (Cc5) | Isolated from human fatal septicemia after dog bite, 1995, Libramont, Belgium | (3)        |
| <i>Cc5ΔPUL1</i>              | Substitution of <i>PUL1</i> by <i>ermF</i> ; Em <sup>R</sup>                  | (4)        |
| <i>Cc5ΔPUL2</i>              | Substitution of <i>PUL2</i> by <i>ermF</i> ; Em <sup>R</sup>                  | (4)        |
| <i>Cc5ΔPUL3</i>              | Substitution of <i>PUL3</i> by <i>ermF</i> ; Em <sup>R</sup>                  | (4)        |
| <i>Cc5ΔPUL4</i>              | Substitution of <i>PUL4</i> by <i>ermF</i> ; Em <sup>R</sup>                  | (4)        |
| <i>Cc5ΔPUL5</i>              | Substitution of <i>PUL5</i> by <i>ermF</i> ; Em <sup>R</sup>                  | (4)        |
| <i>Cc5ΔPUL6</i>              | Substitution of <i>PUL6</i> by <i>ermF</i> ; Em <sup>R</sup>                  | (4)        |
| <i>Cc5ΔPUL7</i>              | Substitution of <i>PUL7</i> by <i>ermF</i> ; Em <sup>R</sup>                  | (4)        |
| <i>Cc5ΔPUL8</i>              | Substitution of <i>PUL8</i> by <i>ermF</i> ; Em <sup>R</sup>                  | (4)        |
| <i>Cc5ΔPUL9</i>              | Substitution of <i>PUL9</i> by <i>ermF</i> ; Em <sup>R</sup>                  | (4)        |
| <i>Cc5ΔPUL10</i>             | Substitution of <i>PUL10</i> by <i>ermF</i> ; Em <sup>R</sup>                 | (4)        |
| <i>Cc5ΔPUL11</i>             | Substitution of <i>PUL11</i> by <i>ermF</i> ; Em <sup>R</sup>                 | (4)        |
| <i>Cc5ΔPUL12</i>             | Substitution of <i>PUL12</i> by <i>ermF</i> ; Em <sup>R</sup>                 | (4)        |
| <i>Cc5ΔPUL13</i>             | Substitution of <i>PUL13</i> by <i>ermF</i> ; Em <sup>R</sup>                 | (4)        |
| <i>Cc5ΔCcan_03610</i>        | Substitution of <i>Ccan_03610</i> by <i>ermF</i> using pFL1; Em <sup>R</sup>  | This study |
| <i>Cc5ΔCcan_03620</i>        | Substitution of <i>Ccan_03620</i> by <i>ermF</i> using pFL2; Em <sup>R</sup>  | This study |
| <i>Cc5ΔCcan_03630</i>        | Substitution of <i>Ccan_03630</i> by <i>ermF</i> using pFL3; Em <sup>R</sup>  | This study |
| <i>Cc5ΔCcan_03640</i>        | Substitution of <i>Ccan_03640</i> by <i>ermF</i> using pFL4; Em <sup>R</sup>  | This study |

|                       |                                                                                               |            |
|-----------------------|-----------------------------------------------------------------------------------------------|------------|
| <i>Cc5ΔCcan_03650</i> | Substitution of <i>Ccan_03650</i> by <i>ermF</i> using pFL5; Em <sup>R</sup>                  | This study |
| <i>Cc5ΔCcan_03660</i> | Substitution of <i>Ccan_03660</i> by <i>ermF</i> using pFL6; Em <sup>R</sup>                  | This study |
| <i>Cc5ΔCcan_03670</i> | Substitution of <i>Ccan_03670</i> by <i>ermF</i> using pFL7; Em <sup>R</sup>                  | This study |
| <i>Cc5ΔCcan_03680</i> | Substitution of <i>Ccan_03680</i> by <i>ermF</i> using pFL8; Em <sup>R</sup>                  | This study |
| <i>Cc5ΔCcan_03690</i> | Substitution of <i>Ccan_03690</i> by <i>ermF</i> using pFL9; Em <sup>R</sup>                  | This study |
| <i>Cc5ΔCcan_03700</i> | Substitution of <i>Ccan_03700</i> by <i>ermF</i> using pFL10; Em <sup>R</sup>                 | This study |
| <i>Cc5ΔCcan_03710</i> | Substitution of <i>Ccan_03710</i> by <i>ermF</i> using pFL11; Em <sup>R</sup>                 | This study |
| <i>Cc5ΔCcan_03720</i> | Substitution of <i>Ccan_03720</i> by <i>ermF</i> using pFL12; Em <sup>R</sup>                 | This study |
| <i>Cc5ΔCcan_03730</i> | Substitution of <i>Ccan_03730</i> by <i>ermF</i> using pFL13; Em <sup>R</sup>                 | This study |
| <i>Cc5ΔCcan_15860</i> | Substitution of <i>Ccan_15860</i> ( <i>furA</i> ) by <i>ermF</i> using pFL61; Em <sup>R</sup> | This study |

**Table S2** Primers used in the study

| Lab.Ref.  | Name          | Sequence 5'-3' (restriction sites are underlined)      | Restriction  |
|-----------|---------------|--------------------------------------------------------|--------------|
| Deletions |               |                                                        |              |
| 6953      | fwd_03640_1.1 | cgctgcaggctacctatatgatggagcc                           | <i>Pst</i> I |
| 6954      | rev_03640_1.2 | aaaaatttcaccttcgtagaaaaacttcttacgattttatttag           |              |
| 7027      | fwd_03640_2.1 | gagtagataaaagcactgtttagggacaggacgtg                    |              |
| 7028      | rev_03640_2.2 | ggactagtatccgtctgtgccaataccc                           | <i>Spe</i> I |
| 6957      | fwd_03640_3.1 | ctaaataaaaatcgtaagaagttttctacgaaggatgaaattttcagggacaac |              |
| 6958      | rev_03640_3.2 | ggacaggacacgtcctgtccctaaacagtgctttatctactccgatagcttc   |              |
| 6959      | fwd_03650_1.1 | cgctgcagtttacgagcaggacatcc                             | <i>Pst</i> I |
| 6960      | rev_03650_1.2 | aaaaatttcaccttcgtagaatgataatcttg                       |              |
| 7050      | fwd_03650_2.1 | gagtagataaaagcactgttcacttggttacaacgttcc                |              |
| 7051      | rev_03650_2.2 | ggactagtatccgagtgtttctacc                              | <i>Spe</i> I |
| 6963      | fwd_03650_3.1 | caaagattatcatttctacgaaggatgaaattttcagggacaac           |              |
| 7052      | rev_03650_3.2 | ggaacgttgtaaccaagtgaaacagtgctttatctactccgatagcttc      |              |
| 6965      | fwd_03660_1.1 | cgctgcagccaaaacagtttacattgacgg                         | <i>Pst</i> I |
| 6966      | rev_03660_1.2 | aaaaatttcaccttcgtagtctctactatttcctatttttac             |              |
| 6967      | fwd_03660_2.1 | gagtagataaaagcactgttaataacaatatataaaaaatagaatag        |              |
| 6968      | rev_03660_2.2 | ggactagtacccaaatagcggaaagg                             | <i>Spe</i> I |
| 6969      | fwd_03660_3.1 | gtaaaaaataggaaatagtagagactacgaaggatgaaattttcagggacaac  |              |
| 6970      | rev_03660_3.2 | ctattctattttatataattgtattaacagtgctttatctactccgatagcttc |              |
| 6971      | fwd_03670_1.1 | cgctgcagaaatcagtggaagtaaccgc                           | <i>Pst</i> I |
| 6972      | rev_03670_1.2 | aaaaatttcaccttcgtagtttatgttcttctgtgag                  |              |
| 6973      | fwd_03670_2.1 | gagtagataaaagcactgttttttagtattgccaacg                  |              |
| 6974      | rev_03670_2.2 | ggactagttttccgtccgtaagggtctgccc                        | <i>Spe</i> I |

|      |               |                                                              |             |
|------|---------------|--------------------------------------------------------------|-------------|
| 6975 | fwd_03670_3.1 | ctacaagaaagaacataaaaactacgaaggatgaaattttcagggacaac           |             |
| 6976 | rev_03670_3.2 | cggtgggcaaataactaaaaaacagtgctttatctactccgatagcttc            |             |
| 6977 | fwd_03680_1.1 | cgctgcagattgggggagagcctcgtgc                                 | <i>PstI</i> |
| 6978 | rev_03680_1.2 | aaaaattcatccttcgtagatcatctgatattttattattgattgatgc            |             |
| 6979 | fwd_03680_2.1 | gagtagataaaagcactgttttgtaaggaaggacgtgtcc                     |             |
| 6980 | rev_03680_2.2 | ggactagtccttctcatcgaaattattgacatcg                           | <i>SpeI</i> |
| 6981 | fwd_03680_3.1 | gcatcaaatcaataataaaaaatcagatgatctacgaaggatgaaattttcagggacaac |             |
| 6982 | rev_03680_3.2 | ggacacgtcccttcttacaacacagtgctttatctactccgatagcttc            |             |
| 7527 | fwd_03690_1.1 | ggctgcaggattgtacgtaaccaatgtgctttcacc                         | <i>PstI</i> |
| 7528 | rev_03690_1.2 | gttgcaaataccgatgagcgattttttattttaagcggaaaggacacg             |             |
| 7529 | fwd_03690_2.1 | cctgaaaaattcatccttcgtagaatatgaaaaatcttattctgttggc            |             |
| 7530 | rev_03690_2.2 | ccactagtgtattcacgagcgggtcaatagaattagtg                       | <i>SpeI</i> |
| 7531 | fwd_03690_3.1 | cggtccttccgctaaaataaaaaataatcgctcatcggtatttgcaac             |             |
| 7532 | rev_03690_3.2 | gccaacagaataagatatttttcatattctacgaaggatgaaattttcagg          |             |
| 7533 | fwd_03700_1.1 | ggctgcagcgaagacttctgattgtacaagagaccg                         | <i>PstI</i> |
| 7534 | rev_03700_1.2 | gttgcaaataccgatgagcattttattgatttacgtatgatttaagtcgc           |             |
| 7535 | fwd_03700_2.1 | cctgaaaaattcatccttcgtagaaacaagctaaaaataatgatgac              |             |
| 7536 | rev_03700_2.2 | ccactagtcctctttgaaacggctgagatacttgc                          | <i>SpeI</i> |
| 7537 | fwd_03700_3.1 | gcgactaaatcatcgtaaatcaataaaatgctcatcggtatttgcaac             |             |
| 7538 | rev_03700_3.2 | gtcatatttttttagctgtttctacgaaggatgaaattttcagg                 |             |
| 6995 | fwd_03710_1.1 | cgctgcagcagaaaataatgttcagaaagc                               | <i>PstI</i> |
| 6996 | rev_03710_1.2 | aaaaattcatccttcgtagatttttttagctgtttctatttgc                  |             |
| 6997 | fwd_03710_2.1 | gagtagataaaagcactgttacgtgttggaaatgacagcgg                    |             |
| 6998 | rev_03710_2.2 | ggactagtttctgcaatcgcaacttgatac                               | <i>SpeI</i> |
| 6999 | fwd_03710_3.1 | gacaaatagaacaagctaaaaataatctacgaaggatgaaattttcagggacaac      |             |

|      |               |                                                           |             |
|------|---------------|-----------------------------------------------------------|-------------|
| 7000 | rev_03710_3.2 | ccgctgtcattccaacacgtaacagtgctttatctactccgatagcttc         |             |
| 7001 | fwd_03720_1.1 | cgctgcagtcattgataatcagcgagag                              | <i>PstI</i> |
| 7002 | rev_03720_1.2 | aaaaattcatccttcgtagatTTTTctgttgaagaacaagaatcgcc           |             |
| 7003 | fwd_03720_2.1 | gagtagataaaagcactgttagtaaaaaggattttcttttc                 |             |
| 7004 | rev_03720_2.2 | ggactagtctccttgaagagaggaagcc                              | <i>SpeI</i> |
| 7005 | fwd_03720_3.1 | ggcgattctgttcttacaacagaaaaatctacgaaggatgaaattttcagggacaac |             |
| 7006 | rev_03720_3.2 | gaaaagaaaatccttttactaacagtgctttatctactccgatagcttc         |             |
| 7059 | fwd_03610_1.1 | cgctgcagaatactctatttacacgg                                | <i>PstI</i> |
| 7060 | rev_03610_1.2 | aaaaattcatccttcgtagtttataaatttggtg                        |             |
| 7061 | fwd_03610_2.1 | gagtagataaaagcactgtTTTTgaaactgtcattgg                     |             |
| 7062 | rev_03610_2.2 | ggactagtaagtgcccaatttctgc                                 | <i>SpeI</i> |
| 7063 | fwd_03610_3.1 | cacccaaaattataaaactacgaaggatgaaattttcagggacaac            |             |
| 7064 | rev_03610_3.2 | ccaatgacagttcaaaaaaacagtgctttatctactccgatagcttc           |             |
| 7065 | fwd_03620_1.1 | cgctgcagattagtagtggcattgg                                 | <i>PstI</i> |
| 7066 | rev_03620_1.2 | aaaaattcatccttcgtagaatTTTTctttaaagtagatc                  |             |
| 7067 | fwd_03620_2.1 | gagtagataaaagcactgttaattgTTTTtattacaatc                   |             |
| 7068 | rev_03620_2.2 | ggactagttgagacagagtaaaagc                                 | <i>SpeI</i> |
| 7069 | fwd_03620_3.1 | gatcactttaagaaaatattctacgaaggatgaaattttcagggacaac         |             |
| 7070 | rev_03620_3.2 | gattgtaagataaaaaacaaattaacagtgctttatctactccgatagcttc      |             |
| 7085 | fwd_03730_1.1 | cgctgcagatagggttatccctgctggggaagg                         | <i>PstI</i> |
| 7086 | rev_03730_1.2 | aaaaattcatccttcgtagctTTTTctatttatctg                      |             |
| 7087 | fwd_03730_2.1 | gagtagataaaagcactgttaatctgtataaaaatgc                     |             |
| 7088 | rev_03730_2.2 | ggactagtcatcgagaggaagcaaaatataatcc                        | <i>SpeI</i> |
| 7089 | fwd_03730_3.1 | cagatataaatagaaaagagctacgaaggatgaaattttcagggacaac         |             |
| 7090 | rev_03730_3.2 | gcattttatacagattaacagtgctttatctactccgatagcttc             |             |

|      |                      |                                                             |             |
|------|----------------------|-------------------------------------------------------------|-------------|
| 7096 | fwd_03630_1.1        | cgctgcagacgctgataccagattgattgattttcaaacagg                  | <i>PstI</i> |
| 7097 | rev_03630_1.2        | aaaaatttcaccttcgtagattcaatacttattcattgttttaatgc             |             |
| 7098 | fwd_03630_2.1        | gagtagataaaagcactgttgcatcaatcagctacaaccaaaaatcc             |             |
| 7099 | rev_03630_2.2        | ggactagttactccgagtattgggtggc                                | <i>SpeI</i> |
| 7100 | fwd_03630_3.1        | gcattaaaaacaaatgataagtattgaaatctacgaaggatgaaattttcagggacaac |             |
| 7101 | rev_03630_3.2        | ggatttttgggtgtagctgattgatgcaacagtgctttatctactccgatagcttc    |             |
| 7102 | FR227-1.1furAKOPstI  | cgctgcagggaaattggataaatacaataatg                            | <i>PstI</i> |
| 7103 | FR228-1.2-furAKO     | gagtagataaaagcactgttctgcttgggtgtttcttttttag                 |             |
| 7104 | FR229-2.1-furAKO     | gaaaaatttcaccttcgtagccaagatggcagtagattattac                 |             |
| 7105 | FR230-2.2-furAKOSpel | ggactagttattggcaaggttacgataacg                              | <i>SpeI</i> |
| 7106 | FR231-3.1-furAKO     | ctaaaaagaaaacaccaagcagaacagtgctttatctactc                   |             |
| 7107 | FR232-3.2-furAKO     | gtaataaatctactgcatcttggtacgaaggatgaaattttc                  |             |

*Trans-complementations and PCR screening*

|      |                |                                                    |             |
|------|----------------|----------------------------------------------------|-------------|
| 7036 | fwd_Ccan_03640 | cgtaccatggcgtgttaccaaagatagg                       | <i>NcoI</i> |
| 7037 | rev_Ccan_03640 | tgactagttaaaacttcacattcactcc                       | <i>SpeI</i> |
| 7038 | fwd_Ccan_03650 | cgtaccatggcgaatcaatcaatgataaagaaactactatatagcg     | <i>NcoI</i> |
| 7039 | rev_Ccan_03650 | tgactagttaaaacccaacatttacc                         | <i>SpeI</i> |
| 7040 | fwd_Ccan_03680 | cgtaccatggcgccaacgaaagagcatcaaac                   | <i>NcoI</i> |
| 7041 | rev_Ccan_03680 | tgactagttatcttgattgggtgctaaacc                     | <i>SpeI</i> |
| 7042 | fwd_Ccan_03690 | cgtaccatggcgagaagaataacataatattaacattgg            | <i>NcoI</i> |
| 7043 | rev_Ccan_03690 | tgactagttattgatttacgtagtttaagtgcg                  | <i>SpeI</i> |
| 7044 | fwd_Ccan_03700 | cgtaccatggcgaaaaaatatcttattctgttggc                | <i>NcoI</i> |
| 7045 | rev_Ccan_03700 | tgactagttattgtcaactatttcagc                        | <i>SpeI</i> |
| 7046 | fwd_Ccan_03710 | cgtaccatggcgacaatgaatagaaaatatttttgataatattactgggg | <i>NcoI</i> |

|      |                |                                          |      |
|------|----------------|------------------------------------------|------|
| 7047 | rev_Ccan_03710 | tgactagttatggcaaaataataactcgc            | SpeI |
| 7048 | fwd_Ccan_03720 | cgtaccatggcgtggaaatatacagttttaatagtgtccc | NcoI |
| 7049 | rev_Ccan_03720 | tgactagttatcttttatatcattgattgaaattccg    | SpeI |
| 7077 | fwd_Ccan_03660 | cgtaccatggatagtcataattggatagaaaagtgg     | NcoI |
| 7078 | rev_Ccan_03660 | tgactagttattgcttccgtgctacaaaatcgg        | SpeI |
| 7079 | fwd_Ccan_03670 | cgtaccatggcgaagtcaaaaaaaaaatag           | NcoI |
| 7080 | rev_Ccan_03670 | tgactagttatcttctcaaaaataagc              | SpeI |
| 3451 | fwd_16S        | agagtttgatcctggctcag                     |      |
| 3454 | rev_16S        | gggttgcgctcgttg                          |      |

| Sequencing |           |                                |  |
|------------|-----------|--------------------------------|--|
| 3818       | pMM25_fwd | gtttcccagtcacgac               |  |
| 4730       | pMM25_rev | ggcacgttccagttcttcag           |  |
| 7125       | ermF_seq1 | atgctcaaattgtttgttctcc         |  |
| 7126       | ermF_seq2 | gagcaaacatataaccgaggaacaaagtgc |  |

| qPCR |              |                           |  |
|------|--------------|---------------------------|--|
| 7335 | 03640-F-qPCR | caatgCGGctcgaatgactg      |  |
| 7336 | 03640-R-qPCR | gggaatgggcgtagaaacca      |  |
| 7337 | 03650-F-qPCR | tcggtgaggTggtgttacg       |  |
| 7338 | 03650-R-qPCR | tacgCgtccttcgagcatac      |  |
| 7339 | 03680-F-qPCR | caggcaaacaagcgttgga       |  |
| 7340 | 03680-R-qPCR | gttccgtaaggTctgccca       |  |
| 7341 | 08720-F-qPCR | ggacagTgttactgttatcaagtc  |  |
| 7342 | 08720-R-qPCR | gctataatgtgacgagctaaatcac |  |
| 7343 | 16S -F-qPCR  | tgagtggctaagcgaagtga      |  |

|                   |                   |                                                          |             |
|-------------------|-------------------|----------------------------------------------------------|-------------|
| 7344              | 16S -R-qPCR       | cttggaagggtcctcgcg                                       |             |
| pPM5 construction |                   |                                                          |             |
| 5470              | PM177_Fj_Pompa_fw | cgatgctcgacttttttaacattgattttgtatttaaaaaattgggtgtactttgc | <i>Sall</i> |
| 5471              | PM178_Fj_Pompa_rv | cgatccatgggtaatttttaattacaattagttaattacaagcaaaagtaacacc  | <i>NcoI</i> |

**Table S3** Plasmids used in the study

| Plasmid          | Description                                                                                                                                                                                                                                                                                                                                                  | Reference  |
|------------------|--------------------------------------------------------------------------------------------------------------------------------------------------------------------------------------------------------------------------------------------------------------------------------------------------------------------------------------------------------------|------------|
| Vectors          |                                                                                                                                                                                                                                                                                                                                                              |            |
| pMM13            | <i>oriColE1</i> , Em <sup>R</sup> .                                                                                                                                                                                                                                                                                                                          | (5)        |
| pMM25            | <i>oriColE1</i> , Km <sup>R</sup> , Cfx <sup>R</sup> .                                                                                                                                                                                                                                                                                                       | (5)        |
| pMM47.A          | <i>oriColE1</i> , <i>ori pCC7</i> , Ap <sup>R</sup> , Cfx <sup>R</sup> .                                                                                                                                                                                                                                                                                     | (5)        |
| pPM5             | <i>oriColE1</i> , <i>ori pCC7</i> , Ap <sup>R</sup> , Cfx <sup>R</sup> ; promoter of <i>ompA</i> ( <i>Fjoh_0697</i> ) from <i>Flavobacterium johnsoniae</i> was amplified by PCR using primers 5470 and 5471, digested with <i>Sall</i> and <i>NcoI</i> , and inserted into the corresponding sites of pMM47.A, replacing the original <i>ermF</i> promoter. | This study |
| Mutator Plasmids |                                                                                                                                                                                                                                                                                                                                                              |            |
| pFL1             | <i>ermF</i> framed by the 5' and 3' regions of <i>Ccan_03610</i> cloned into pMM25                                                                                                                                                                                                                                                                           | This study |
| pFL2             | <i>ermF</i> framed by the 5' and 3' regions of <i>Ccan_03620</i> cloned into pMM25                                                                                                                                                                                                                                                                           | This study |
| pFL3             | <i>ermF</i> framed by the 5' and 3' regions of <i>Ccan_03630</i> cloned into pMM25                                                                                                                                                                                                                                                                           | This study |
| pFL4             | <i>ermF</i> framed by the 5' and 3' regions of <i>Ccan_03640</i> cloned into pMM25                                                                                                                                                                                                                                                                           | This study |
| pFL5             | <i>ermF</i> framed by the 5' and 3' regions of <i>Ccan_03650</i> cloned into pMM25                                                                                                                                                                                                                                                                           | This study |
| pFL6             | <i>ermF</i> framed by the 5' and 3' regions of <i>Ccan_03660</i> cloned into pMM25                                                                                                                                                                                                                                                                           | This study |
| pFL7             | <i>ermF</i> framed by the 5' and 3' regions of <i>Ccan_03670</i> cloned into pMM25                                                                                                                                                                                                                                                                           | This study |



|       |                                                                                    |            |
|-------|------------------------------------------------------------------------------------|------------|
| pFL8  | <i>ermF</i> framed by the 5' and 3' regions of <i>Ccan_03680</i> cloned into pMM25 | This study |
| pFL9  | <i>ermF</i> framed by the 5' and 3' regions of <i>Ccan_03690</i> cloned into pMM25 | This study |
| pFL10 | <i>ermF</i> framed by the 5' and 3' regions of <i>Ccan_03700</i> cloned into pMM25 | This study |
| pFL11 | <i>ermF</i> framed by the 5' and 3' regions of <i>Ccan_03710</i> cloned into pMM25 | This study |
| pFL12 | <i>ermF</i> framed by the 5' and 3' regions of <i>Ccan_03720</i> cloned into pMM25 | This study |
| pFL13 | <i>ermF</i> framed by the 5' and 3' regions of <i>Ccan_03730</i> cloned into pMM25 | This study |
| pFL61 | <i>ermF</i> framed by the 5' and 3' regions of <i>Ccan_15860</i> cloned into pMM25 | This study |

| <i>Trans-complementation Plasmids</i> |                                                                   |            |
|---------------------------------------|-------------------------------------------------------------------|------------|
| pFL14                                 | <i>Ccan_03640</i> amplified with 7036 & 7037 and cloned into pPM5 | This study |
| pFL15                                 | <i>Ccan_03650</i> amplified with 7038 & 7039 and cloned into pPM5 | This study |
| pFL16                                 | <i>Ccan_03660</i> amplified with 7077 & 7078 and cloned into pPM5 | This study |
| pFL17                                 | <i>Ccan_03670</i> amplified with 7079 & 7080 and cloned into pPM5 | This study |
| pFL18                                 | <i>Ccan_03680</i> amplified with 7040 & 7041 and cloned into pPM5 | This study |
| pFL19                                 | <i>Ccan_03690</i> amplified with 7042 & 7043 and cloned into pPM5 | This study |
| pFL20                                 | <i>Ccan_03700</i> amplified with 7044 & 7045 and cloned into pPM5 | This study |
| pFL21                                 | <i>Ccan_03710</i> amplified with 7046 & 7047 and cloned into pPM5 | This study |
| pFL22                                 | <i>Ccan_03720</i> amplified with 7048 & 7049 and cloned into pPM5 | This study |

**Table S4** Protein and iron concentration of products used in the study

|                                                              | <b>[Iron] (<math>\mu\text{M}</math>)</b> | <b>[Protein] (g/l)</b> |
|--------------------------------------------------------------|------------------------------------------|------------------------|
| Serotransferrin                                              | $41.2 \pm 3.0$                           | $5.4 \pm 0.2$          |
| Apotransferrin                                               | $0.5 \pm 0.2$                            | $4.4 \pm 0.1$          |
| Lactoferrin                                                  | $37.4 \pm 7.2$                           | $3.5 \pm 0.1$          |
| Bovine transferrin                                           | $38.1 \pm 3.5$                           | $4.3 \pm 0.2$          |
| Hemoglobin                                                   | $257.4 \pm 16.3$                         | $5.9 \pm 0.6$          |
| Human serum, heat inactivated (Millipore)                    | $18.1 \pm 1.0$                           | $49.0 \pm 1.1$         |
| Human serum, heat inactivated (University Hospital of Basel) | $19.5 \pm 1.7$                           | $57.2 \pm 5.2$         |
| Protein depleted human serum, heat inactivated               | $0.9 \pm 0.6$                            | N/A                    |

Fig.S1

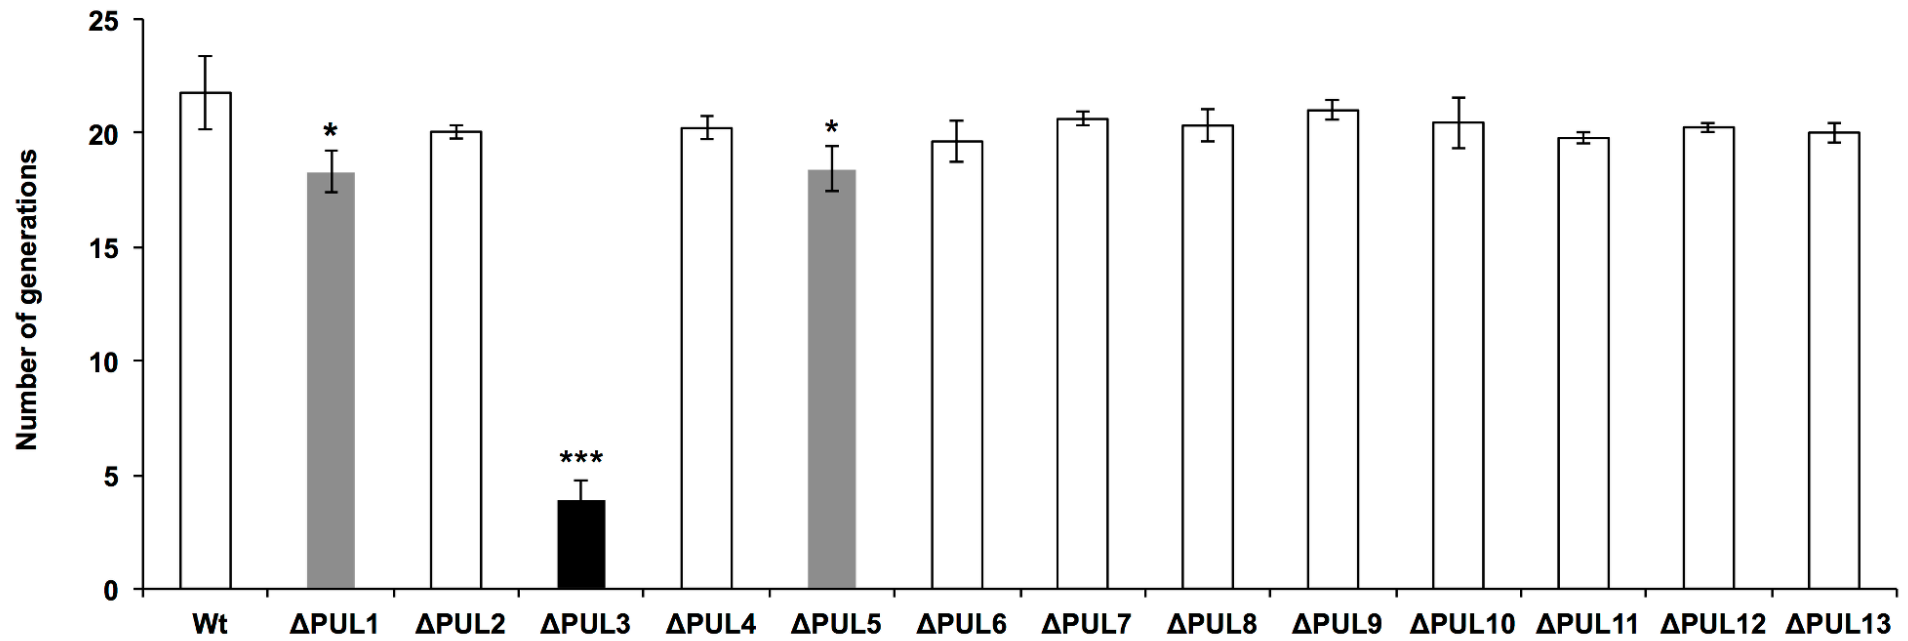

Figure S1.

**Growth in HIHS of *C. canimorsus* 5 mutants deleted from individual PULs**

Number of generations achieved by each of the individual *PUL* deletion mutant after 23 hours in HIHS. The black bar and to a lesser extent the dark grey bars indicate significantly reduced growth scores with respect to wt. Error bars indicate standard deviations (average of 3 experiments).

(\*) and (\*\*\*) apply to comparisons to wt values and stand for *t*-test based error probabilities of <0.05 and <0.001 respectively.

Fig.S2

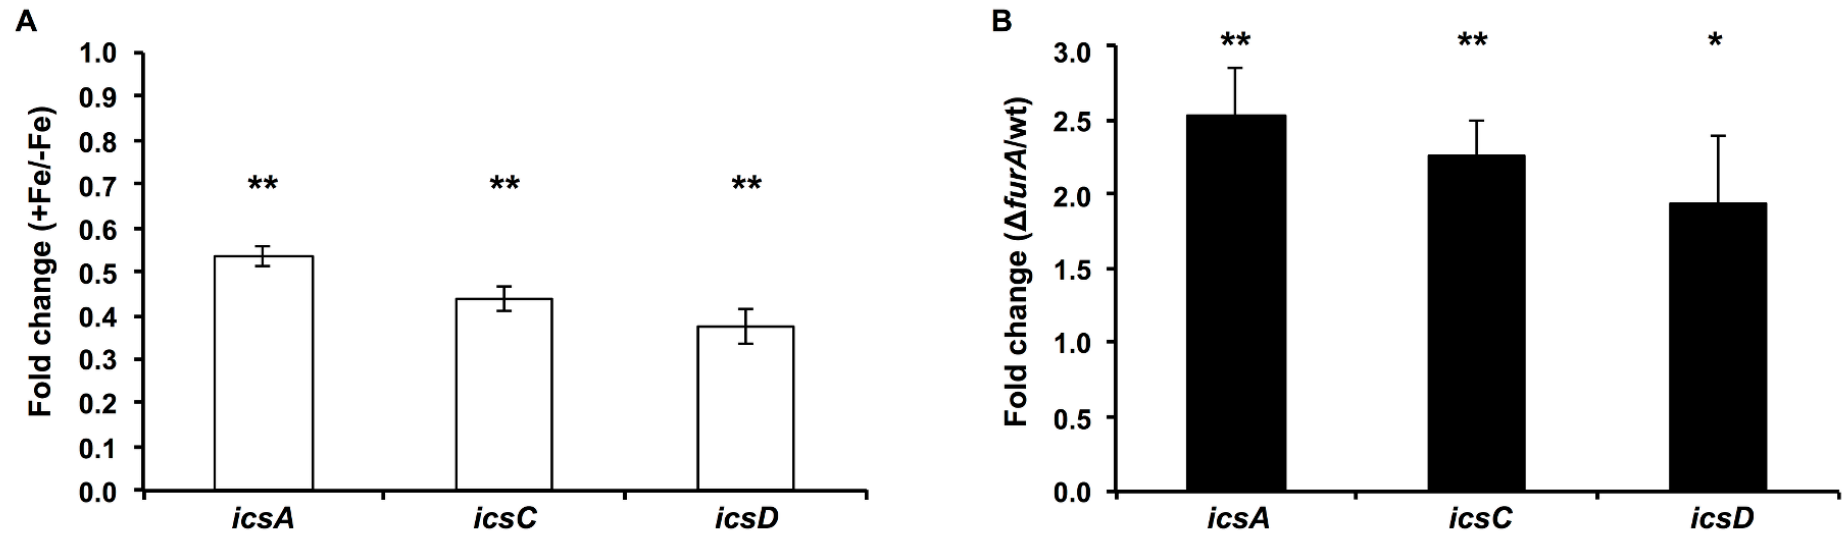

Figure S2.

**Regulation of transcription of *PUL3* by free iron and the FurA transcriptional regulator**

Fold change of mRNA levels of the two *susC* homologues *Ccan\_03640* and *Ccan\_03650* and the *susD* homologue *Ccan\_03680*. (A) Relative mRNA levels from wt bacteria grown in HIHS plus iron (III) citrate (+Fe) vs. HIHS with no iron supplementation (-Fe). (B) Relative mRNA levels of  $\Delta furA$  vs. wt Cc5 grown in HIHS. Error bars represent the standard deviation (average of 3 experiments). (\*) and (\*\*) apply to comparisons to wt values and stand for *t*-test based error probabilities of <0.05 and <0.01 respectively.

Fig.S3

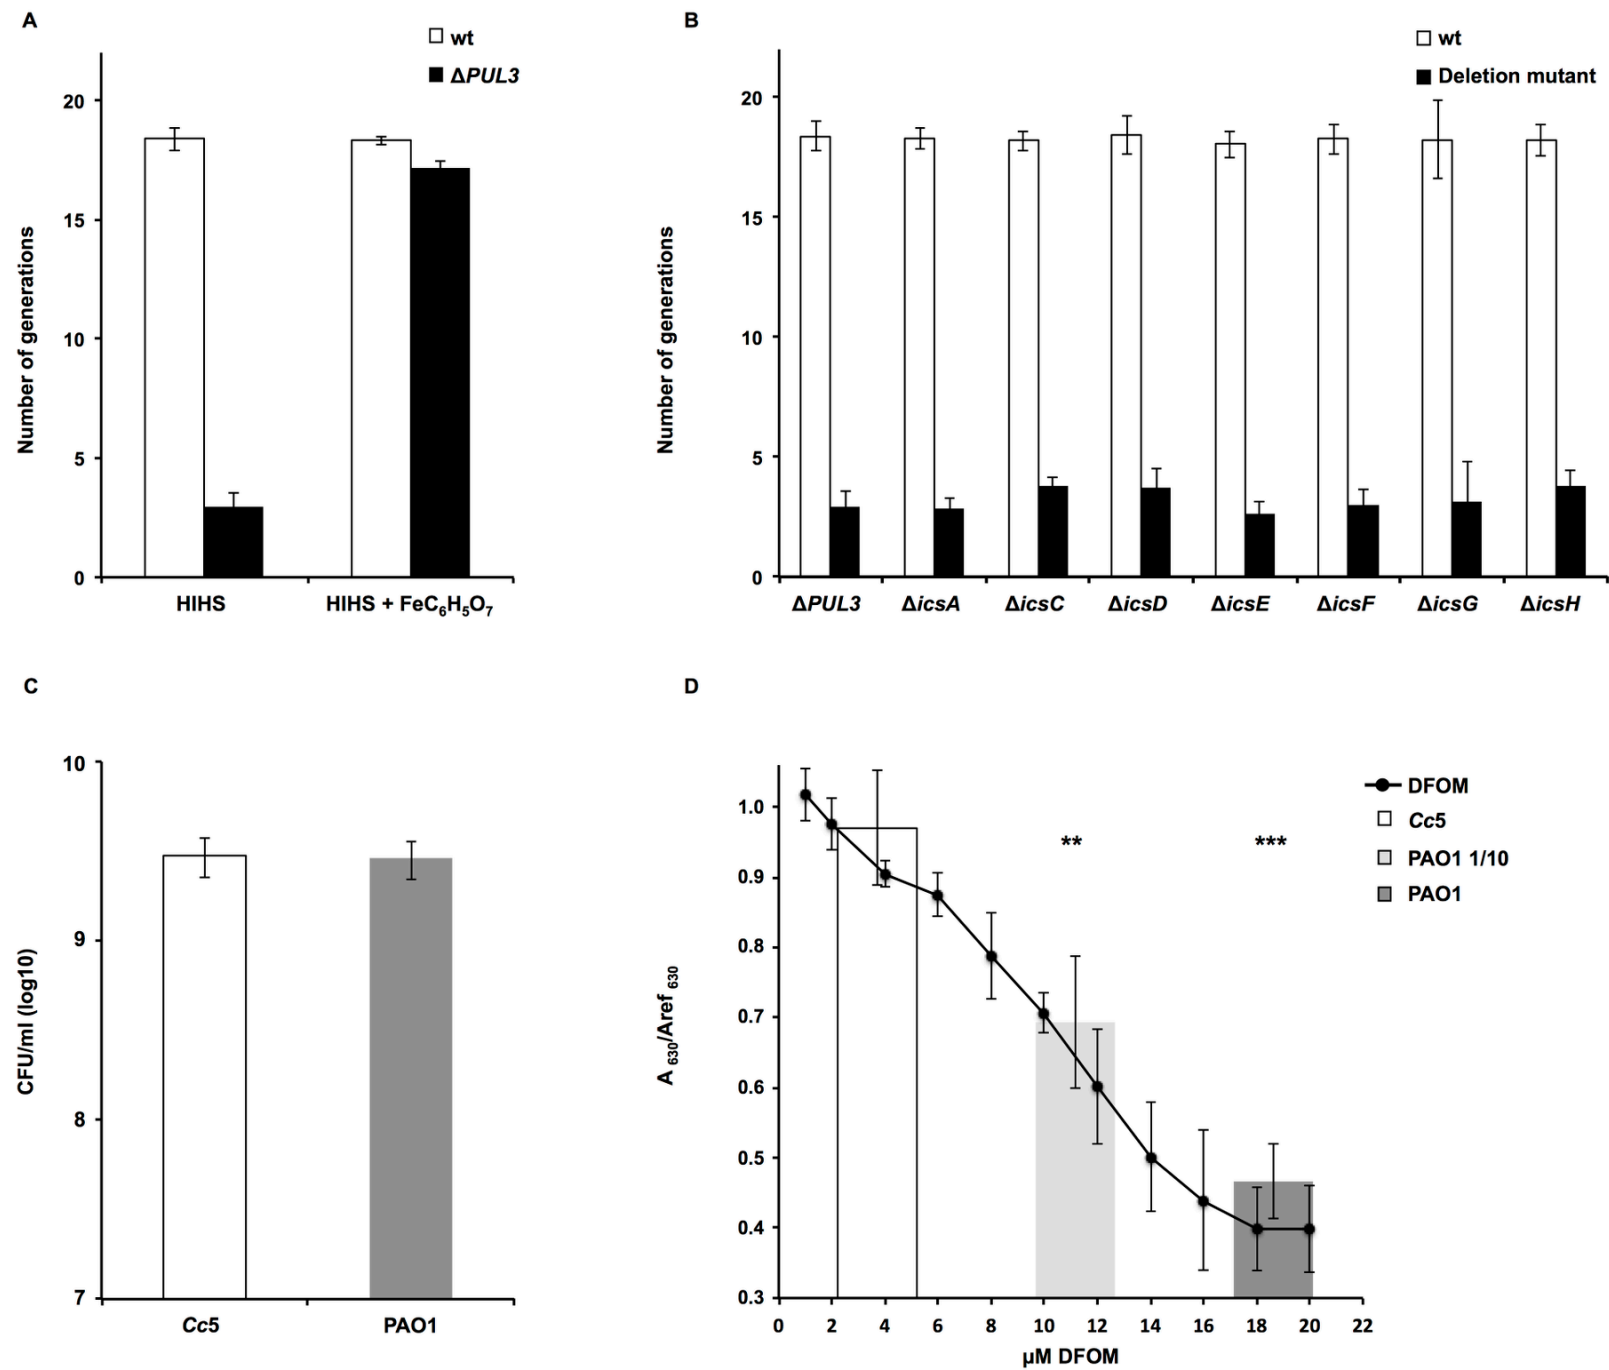

## Figure S3.

### Iron capture from transferrin does not involve soluble factors

(A) Number of generations achieved by wt (white bars) and  $\Delta PUL3$  (black bars) *C. canimorsus* bacteria after 23 hours of co-culture in HIHS alone or supplemented with 0.25 mM iron (III) citrate ( $\text{FeC}_6\text{H}_5\text{O}_7$ ). (B) Number of generations achieved by the wt (white bars) and each of the individual *ics* deletion mutants (black bars) after 23 hours of co-culture in HIHS. (C) Total growth in HIHS of *P. aeruginosa* PAO1 wt (dark grey bar) and *Cc5* wt (white bar). (D) Siderophore detection in *Cc5* wt (white bar) and *P. aeruginosa* PAO1 wt (light and dark grey bars) HIHS culture supernatants using the chrome azurol S assay. Decrease of the ratio  $A/A_{\text{ref}}$  at 630 nm indicates presence of siderophore. Dots: dilution series of the iron chelator desferrioxamine mesylate (DFOM) used as standard curve. PAO1 1/10: PAO1 supernatant diluted 1 to 10 in ddH<sub>2</sub>O. Error bars in all panels represent standard deviation (average of 3 experiments). (\*\*) and (\*\*\*) apply to comparisons to *Cc5* wt values and stand for *t*-test based error probabilities of <0.01 and <0.001 respectively.

Fig.S4

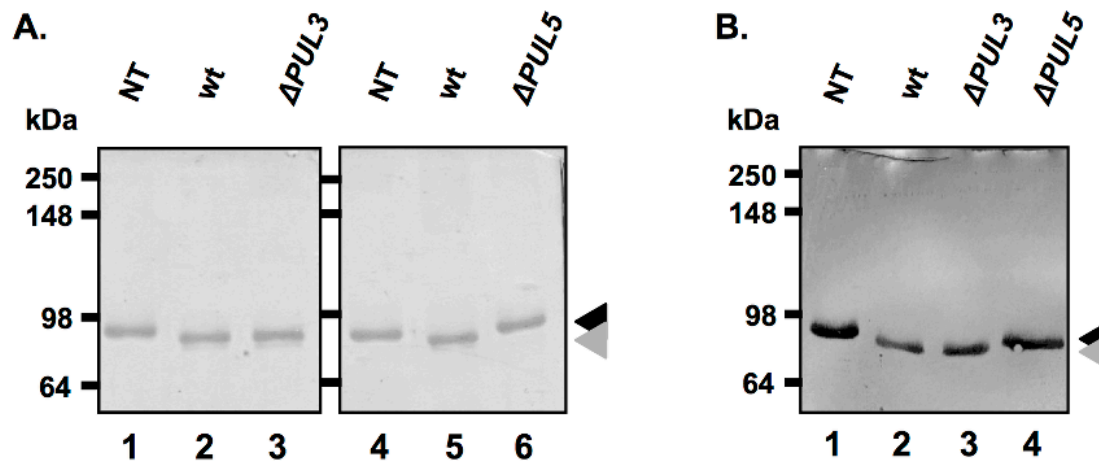

Figure S4.

#### Cleavage of human serotransferrin *N*-glycans by the Gpd complex

(A) Coomassie staining of SDS-PAGE loaded with STF incubated in absence (NT, lane 1 & 4) or presence of wt (lane 2 & 5), *PUL3* deleted (lane 3) or *PUL5* deleted (lane 6) *C. canimorsus*. (B) *Sambucus Nigra* Lectin (SNA) staining of human STF incubated in absence (NT, lane 1) or presence of wt (lane 2), *PUL3* deleted (lane 3) or *PUL5* deleted (lane 4) *C. canimorsus*. Numbers on the left indicate protein mass of the references in kDa. Grey and black arrows indicate a shift in electrophoretic mobility of STF.

Fig.S5

**A.**

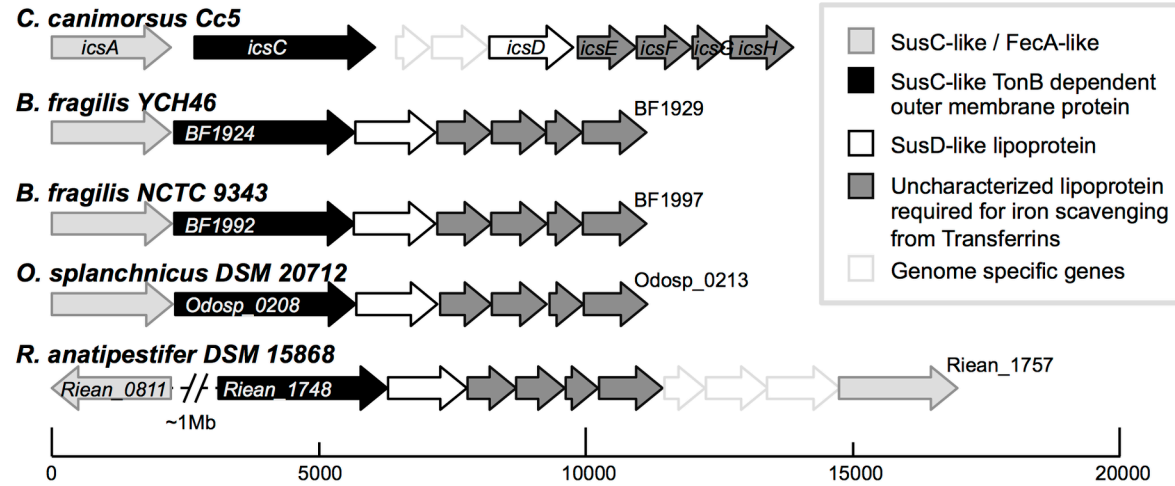

**B.**

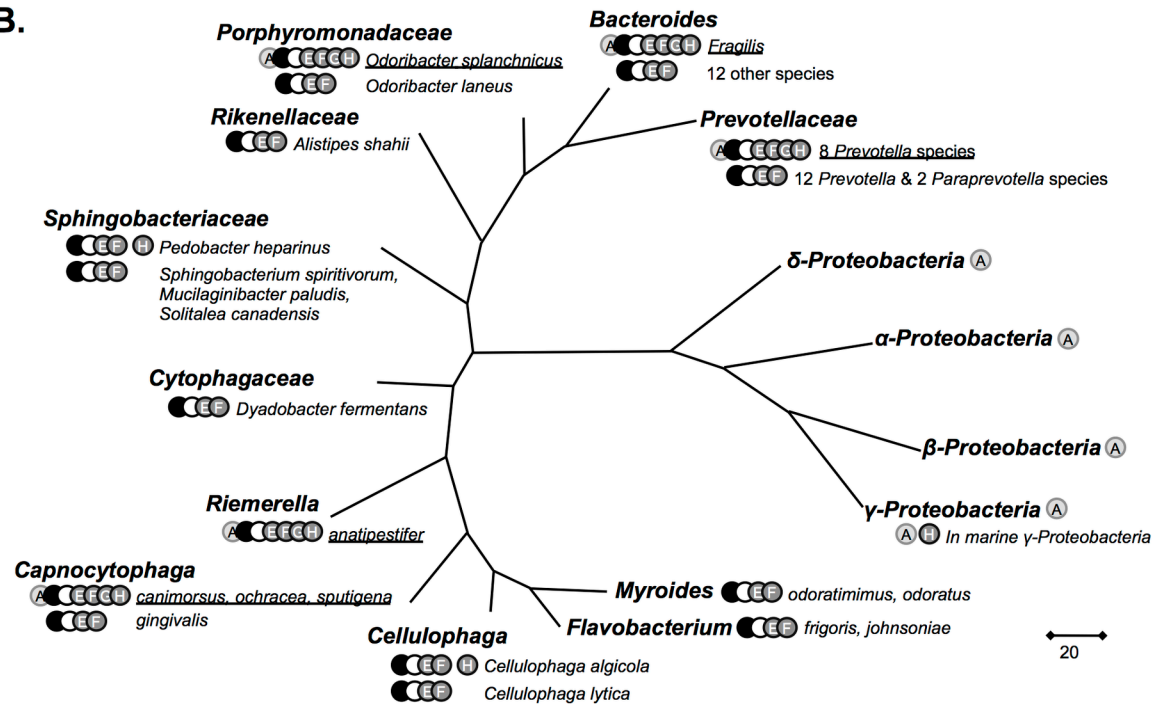



## Figure S5.

### The ICS is mostly found among pathogenic members from the *Bacteroidetes* phylum and has broad species specificity

(A) Orthologous *PULs* of *Cc5 PUL3* identified in the Complete Genomes database. The *PULs* display has been limited to the genes implicated in iron scavenging with a putative TonB-dependent outer membrane protein ortholog to either *icsA* or *icsC*. For the sake of readability, only the largest SusC like homologs and the last represented genes are tagged here. In the case of *R. anatipestifer* DSM 15868, an additional FecA-like protein that shares higher similarity with other orthologs than with its paralog is found at approximately 1 Mb from the SusC like protein. (B) Non-exhaustive occurrences of *PUL3* genes among other bacteria spotted on a representative 16S rRNA phylogenetic tree. The evolutionary history has been inferred using the Maximum Parsimony method and the consensual 16S rRNA sequences from the different taxa where genes from *PUL3* were found. Spots indicate major combinations of *PUL3* encoded genes found within each taxon. Letters in the round spots refer to the proteins encoded by *PUL3*, namely IcsA (A), IcsC (C), IcsD (D), IcsE (E), IcsF (F), IcsG (G) and IcsH (H). Underlined taxon names indicate the occurrence of strains exhibiting all seven *ics* genes in their genome.

## References

1. **Simon R PU, & Puhler A.** 1983. A Broad Host Range Mobilization System for In Vivo Genetic Engineering: Transposon Mutagenesis in Gram Negative Bacteria. *Nat Biotech.* **1**:784-791.
2. **Stover CK, Pham XQ, Erwin AL, Mizoguchi SD, Warren P, Hickey MJ, Brinkman FS, Hufnagle WO, Kowalik DJ, Lagrou M, Garber RL, Goltry L, Tolentino E, Westbrook-Wadman S, Yuan Y, Brody LL, Coulter SN, Folger KR, Kas A, Larbig K, Lim R, Smith K, Spencer D, Wong GK, Wu Z, Paulsen IT, Reizer J, Saier MH, Hancock RE, Lory S, Olson MV.** 2000. Complete genome sequence of *Pseudomonas aeruginosa PAO1*, an opportunistic pathogen. *Nature* **406**:959-964.
3. **Shin H, Mally M, Kuhn M, Paroz C, Cornelis GR.** 2007. Escape from immune surveillance by *Capnocytophaga canimorsus*. *J Infect Dis* **195**:375-386.
4. **Manfredi P, Renzi F, Mally M, Sauter L, Schmalzer M, Moes S, Jenö P, Cornelis GR.** 2011. The genome and surface proteome of *Capnocytophaga canimorsus* reveal a key role of glycan foraging systems in host glycoproteins deglycosylation. *Mol Microbiol* **81**:1050-1060.
5. **Mally M, Cornelis GR.** 2008. Genetic tools for studying *Capnocytophaga canimorsus*. *Appl Environ Microbiol* **74**:6369-6377.
